# Supplementary material for: Free Fatty Acid Determination in Broccoli Tissues Using Liquid Chromatography–High-Resolution Mass Spectrometry
Source: MDPI journal article supplement (doi:10.3390/molecules29040754), 2024-02-06
Supplement: s1 [file s1]

## **Supplementary Material**

# **Free Fatty Acids Determination in Broccoli Tissues using Liquid Chromatography-High Resolution Mass Spectrometry**

Christiana Mantzourani, Irene Mesimeri and Maroula G. Kokotou \*

Laboratory of Chemistry, Department of Food Science and Human Nutrition, Agricultural University of Athens, Iera Odos 75, Athens 11855, Greece

\*Corresponding author: Assist. Prof. Maroula G. Kokotou, Department of Food Science and Human Nutrition, Agricultural University of Athens, Iera Odos 75, Athens 11855, Greece, email: [mkokotou@aua.gr](mailto:mkokotou@aua.gr)

### **Table of contents**

1. Table S1. List of analytes together with their exact masses  $[M-H]^-$ , their retention time  $R_t$  (min), and their limits of detection (LOD) and quantification (LOQ).
2. Table S2. Accuracy (recovery %), precision data (RSD %) and matrix factor (MF) in spiked broccoli samples.
3. Figure S1. Extracted ion chromatograms (EICs) of common FFAs in a representative floret sample.

**Table S1.** List of analytes together with their exact masses  $[M-H]^-$ , their retention time  $R_t$  (min), and their limits of detection (LOD) and quantification (LOQ).

| Analyte                                                                   | $[M-H]^-$ | $R_t$ (min) | LOD (ng/mL) | LOQ (ng/mL) |
|---------------------------------------------------------------------------|-----------|-------------|-------------|-------------|
| Caproic acid (C6:0) <sup>1</sup>                                          | 115.0765  | 2.1         | 0.5         | 1.5         |
| Caprylic acid (C8:0) <sup>1</sup>                                         | 143.1078  | 3.3         | 0.5         | 1.1         |
| Nonanoic acid (C9:0) <sup>2</sup>                                         | 157.1234  | 3.7         | 0.5         | 1.2         |
| Capric acid (C10:0) <sup>1</sup>                                          | 171.1391  | 4.1         | 0.5         | 1.7         |
| Lauric acid (C12:0) <sup>1</sup>                                          | 199.1704  | 4.9         | 0.6         | 1.8         |
| Myristic acid (C14:0) <sup>1</sup>                                        | 227.2017  | 5.6         | 0.6         | 1.8         |
| Myristoleic acid (C14:1 n-5) <sup>1</sup>                                 | 225.1850  | 5.1         | 0.6         | 1.8         |
| Pentadecanoic acid (C15:0) <sup>1</sup>                                   | 241.2173  | 6.0         | 0.8         | 2.4         |
| Palmitic acid (C16:0) <sup>1</sup>                                        | 255.2330  | 6.3         | 0.9         | 2.3         |
| <i>cis</i> -9-Palmitoleic acid (C16:1 n-7) <sup>1</sup>                   | 253.2173  | 5.8         | 1.6         | 4.8         |
| Margaric acid (C17:0) <sup>1</sup>                                        | 269.2486  | 6.6         | 0.8         | 2.4         |
| <i>cis</i> -10-Heptadecenoic acid (C17:1 n-7) <sup>1</sup>                | 267.2330  | 6.2         | 0.8         | 2.4         |
| Stearic acid (C18:0) <sup>1</sup>                                         | 283.2643  | 6.8         | 0.9         | 2.8         |
| Oleic acid (C18:1 n-9) <sup>1</sup>                                       | 281.2486  | 6.4         | 0.7         | 2.3         |
| Petroselinic acid (18:1 n-12)                                             | 281.2486  | 6.3         | 0.6         | 2.1         |
| Linoleic acid (C18:2 n-6) <sup>1</sup>                                    | 279.2330  | 6.0         | 0.6         | 1.8         |
| total-Linolenic acid (C18:3) <sup>1</sup>                                 | 277.2173  | 5.5         | 0.6         | 1.8         |
| Arachidic acid (C20:0) <sup>1</sup>                                       | 311.2956  | 7.0         | 0.8         | 2.4         |
| Dihomo- $\gamma$ -linolenic acid (C20:3 n-6) <sup>1</sup>                 | 305.2486  | 6.1         | 0.6         | 1.8         |
| Arachidonic acid (C20:4 n-6) <sup>1</sup>                                 | 303.2330  | 5.9         | 0.6         | 1.8         |
| <i>cis</i> -5,8,11,14,17-Eicosapentaenoic acid (C20:5 n-3) <sup>1</sup>   | 301.2173  | 5.6         | 0.6         | 1.8         |
| Behenic acid (C22:0) <sup>2</sup>                                         | 339.3269  | 7.7         | 0.8         | 2.4         |
| <i>cis</i> -7,10,13,16,19-Docosapentaenoic acid (C22:5 n-3) <sup>1</sup>  | 329.2486  | 6.1         | 0.4         | 1.2         |
| <i>cis</i> -4,7,10,13,16,19-Docosahexaenoic acid (C22:6 n-3) <sup>1</sup> | 327.2330  | 5.9         | 0.4         | 1.2         |

## References

1. Kokotou, M. G., Mantzourani, C., Kokotos, G. (2020). Development of a liquid chromatography-high resolution mass spectrometry method for the determination of free fatty acids in milk. *Molecules*, 25, 1548.
2. Mantzourani, C., Batsika, C. S, Kokotou, M. G., Kokotos, G. (2022). Free fatty acid profiling of Greek yogurt by liquid chromatography-high resolution mass spectrometry (LC-HRMS) analysis. *Food Research International*, 160, 111751.

**Table S2.** Accuracy (recovery %), precision data (RSD %) and matrix factor (MF) in spiked broccoli samples.

| Analyte | Spike level<br>500 ng/mL |         |                       |
|---------|--------------------------|---------|-----------------------|
|         | Recovery<br>(%R)         | RSD (%) | Matrix factor<br>(MF) |
| C6:0    | 89                       | 0.34    | 0.95                  |
| C8:0    | 125                      | 1.96    | 0.78                  |
| C9:0    | 111                      | 12.48   | 0.76                  |
| C10:0   | 100                      | 2.12    | 0.94                  |
| C12:0   | 95                       | 7.42    | 1.31                  |
| C14:0   | 115                      | 1.73    | 1.32                  |
| C14:1   | 105                      | 6.20    | 1.16                  |
| C15:0   | 119                      | 13.09   | 1.02                  |
| C16:0   | 103                      | 4.06    | 1.08                  |
| C16:1   | 103                      | 1.76    | 1.33                  |
| C17:0   | 87                       | 15.68   | 1.07                  |
| C17:1   | 92                       | 11.08   | 1.24                  |
| C18:0   | 86                       | 9.51    | 0.93                  |
| C18:1   | 83                       | 5.82    | 1.39                  |
| C18:2   | 87                       | 8.94    | 1.24                  |
| C18:3   | 79                       | 11.52   | 1.40                  |
| C20:0   | 92                       | 6.06    | 0.88                  |
| C20:3   | 97                       | 6.01    | 0.90                  |
| C20:4   | 91                       | 5.87    | 1.11                  |
| C20:5   | 89                       | 2.50    | 0.80                  |
| C22:0   | 98                       | 2.32    | 1.33                  |
| C22:5   | 89                       | 3.26    | 1.21                  |
| C22:6   | 94                       | 13.74   | 0.53                  |

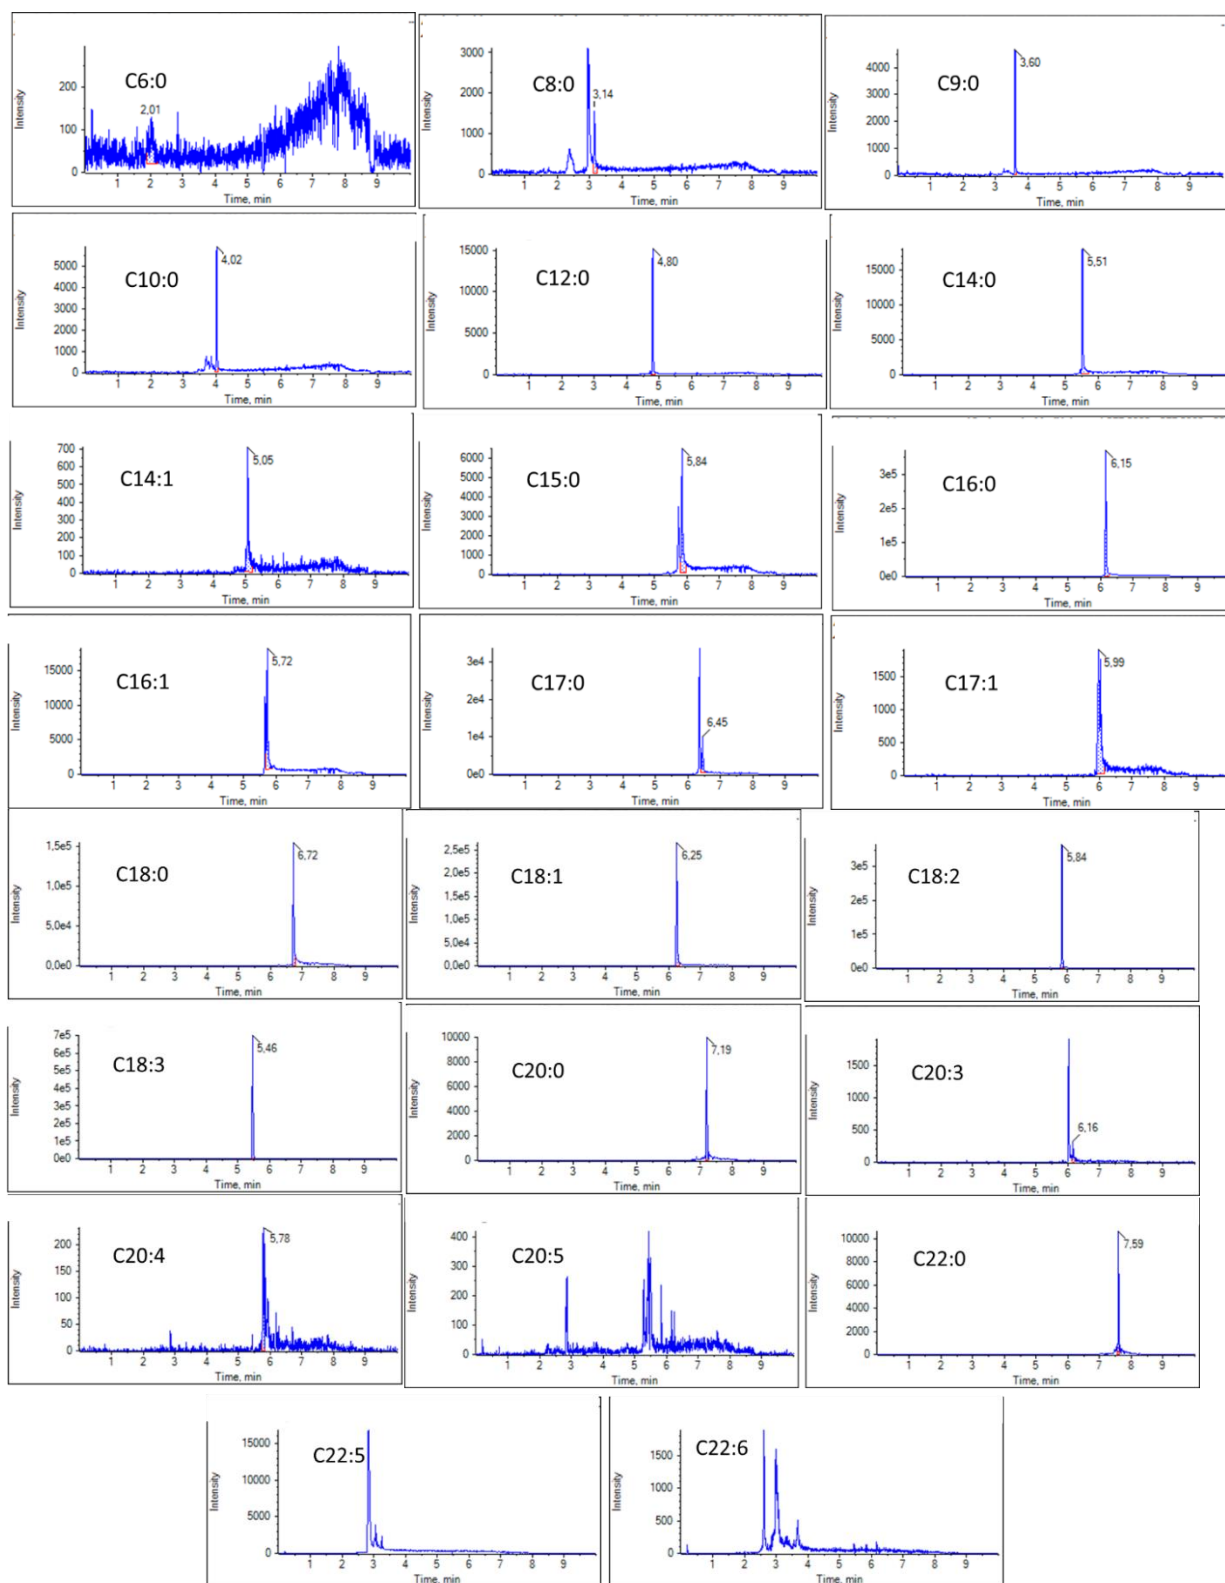

**Figure S1.** Extracted ion chromatograms (EICs) of common FFAs in a representative floret sample.
